# Supplementary material
Source: publisher figshare collection journal article supplement (https://acs.figshare.com/ndownloader/files/21010407)
Supplement: Supplementary file 1 [file 21010407]

# Tuned Hydrogen Bonding in Rare Earth MOFs for Design of Optical and Electronic Properties: An Exemplar Study of Y-DOBDC

*Dayton J. Vogel<sup>a</sup>, Tina M. Nenoff<sup>b</sup>, Jessica M. Rimsza<sup>c,\*</sup>*

- a. Nanoscale Sciences Department, Sandia National Laboratories, Albuquerque, NM 87185 USA
- b. Material, Physical and Chemical Sciences, Sandia National Laboratories, Albuquerque, NM 87185 USA
- c. Geochemistry Department, Sandia National Laboratories, Albuquerque NM 87185, USA

**Table S1.** Total number of H-bonds for each H-bonding configuration % and on which type of ligand the H-bonds are located.

| H-Bonding % | Number of H-bonds | Monodentate H-Bonds | Bidentate H-Bonds |
|-------------|-------------------|---------------------|-------------------|
| 0           | 0                 | 0                   | 0                 |
| 20          | 4                 | 4                   | 0                 |
| 40          | 8                 | 0                   | 8                 |
| 60          | 12                | 4                   | 8                 |
| 80          | 16                | 0                   | 16                |
| 100         | 20                | 4                   | 16                |

---

\* jrimsza@sandia.gov

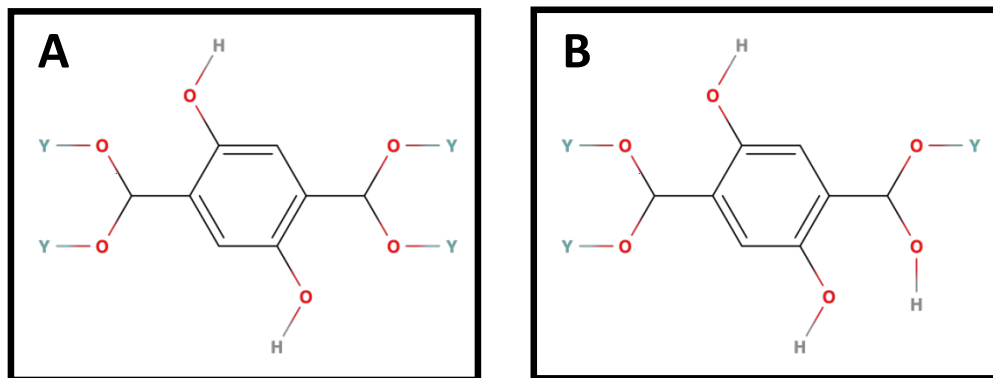

**Figure S1.** Two binding structures of the DOBDC linkers to the metal clusters in a (A) bidentate and (B) monodentate fashion.

**Table S2.** Calculated total energies and calculated average H-bond strength of isolated H<sub>4</sub>-DOBDC.

| H-Bonding Configuration | Total Energy (eV) | H-Bond Strength | kJ/mol |
|-------------------------|-------------------|-----------------|--------|
| Interacting             | -140.02           | $E_{IHB}$       | 27.75  |
| Not Interacting         | -139.44           |                 |        |

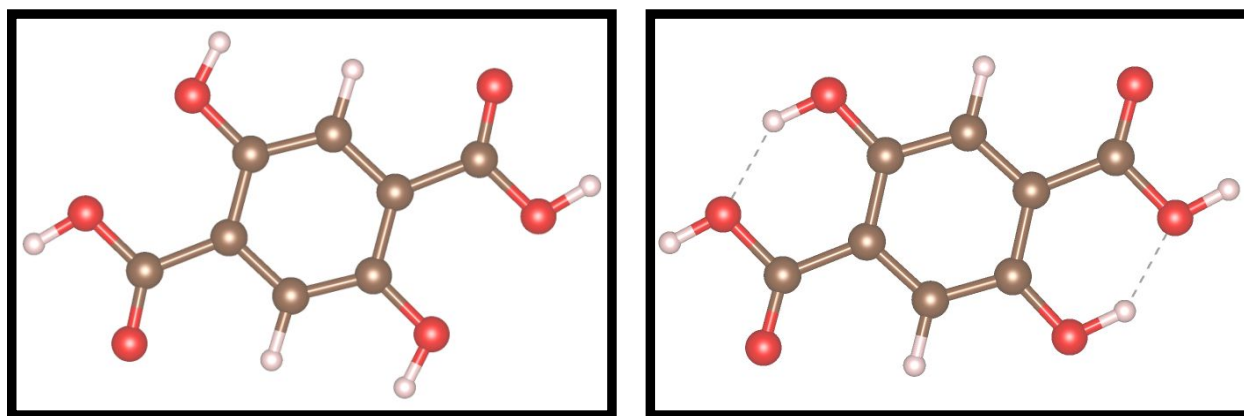

**Figure S2.** Calculated optimized geometries of isolated H<sub>4</sub>-DOBDC molecules with no H-bonding (left) and H-bonding (right). Colors: H (white), O (red), C (grey)

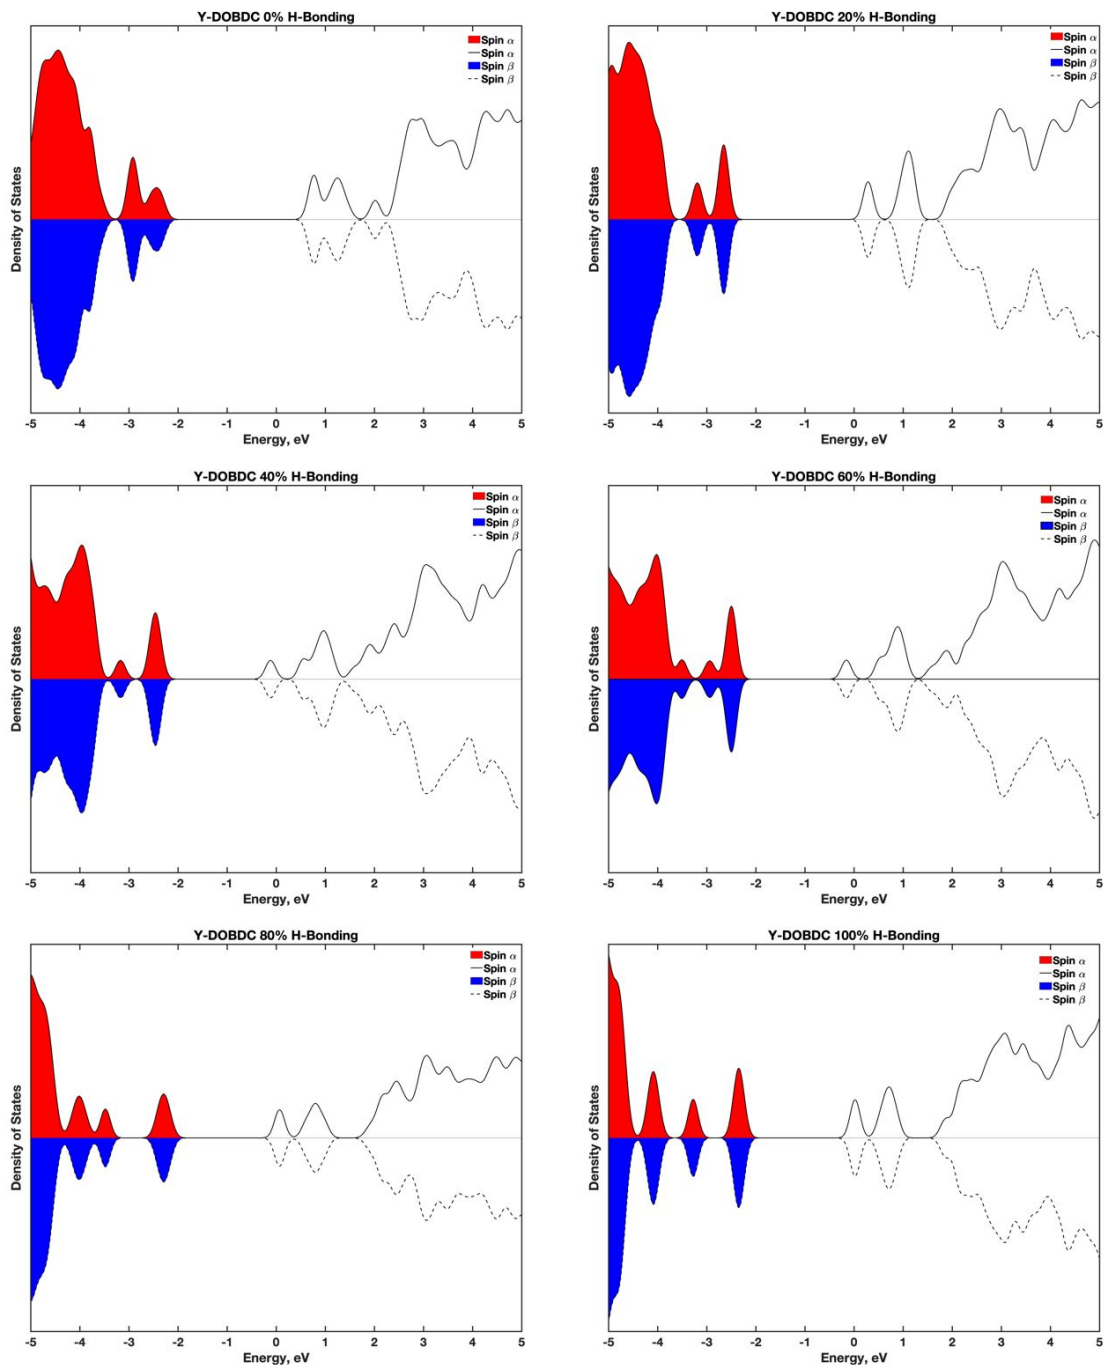

**Figure S3.** Calculated density of states for Y-DOBDC with H-bonding configurations from 0-100% using HSE06. Occupied (shaded) and unoccupied (unshaded) electronic states are plotted for both the spin alpha (red/solid line) and spin beta (blue/dotted line) projections.

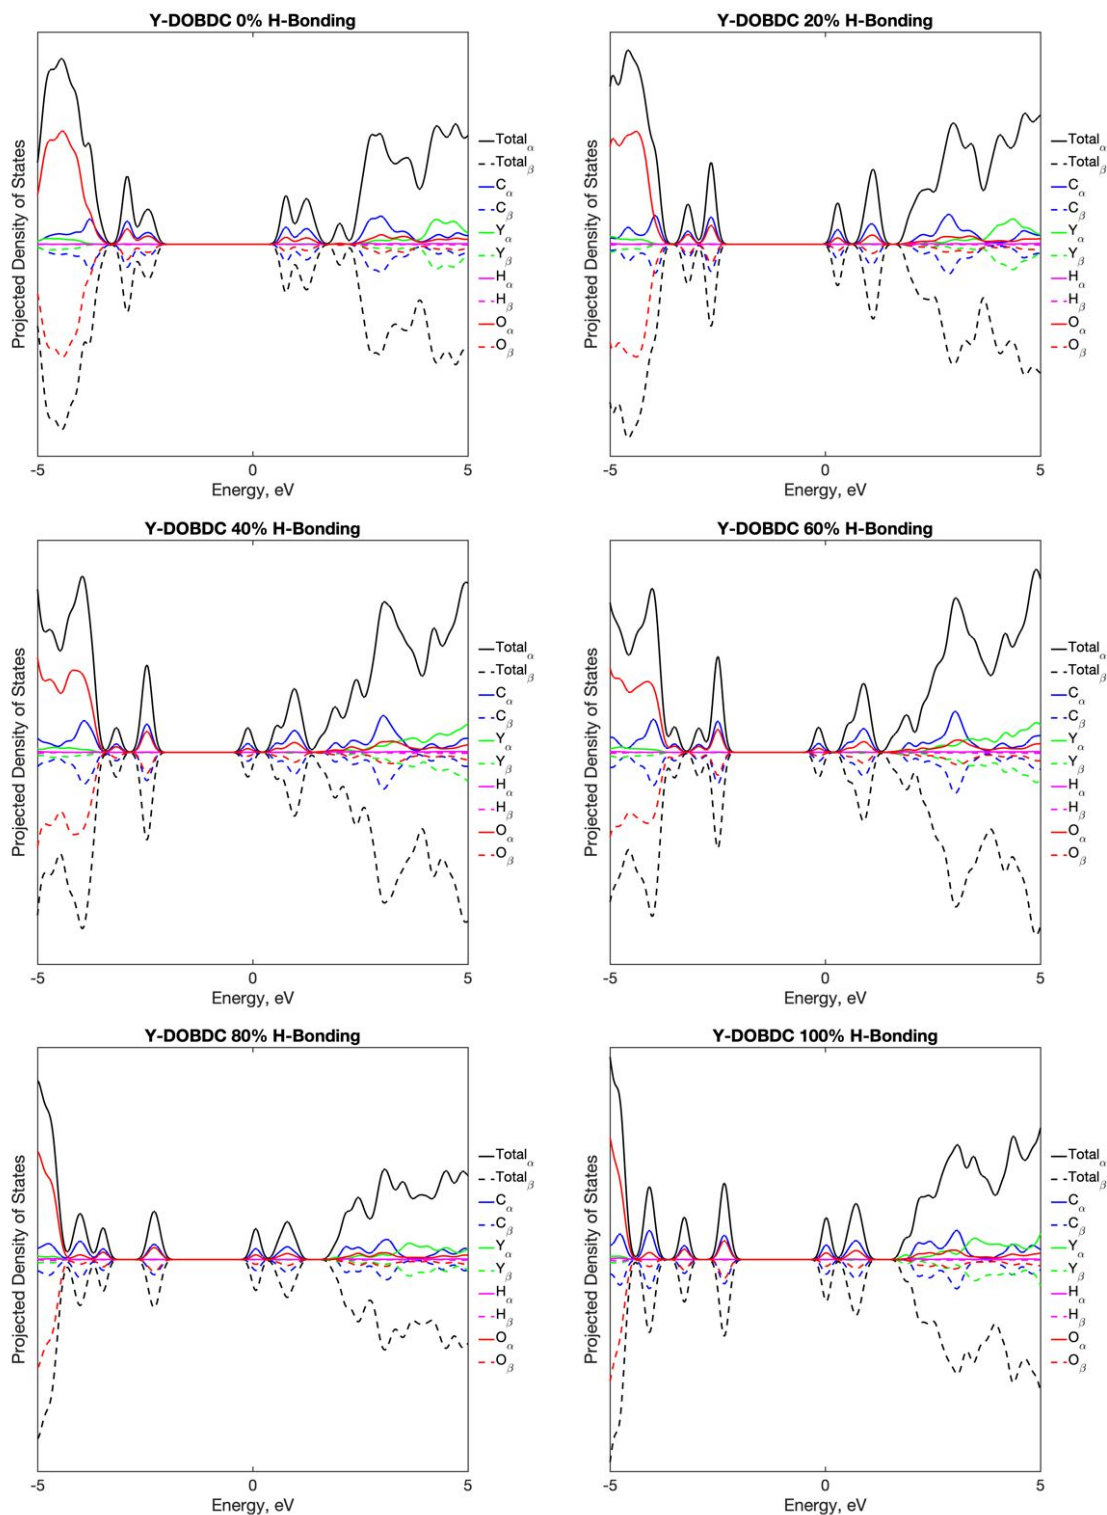

**Figure S4.** Projected density of states (PDOS) for Y-DOBDC with H-bonding configurations from 0-100%, calculated with the HSE06 hybrid functional. Each PDOS plot provides the total DOS (black) and the contribution of the individual elements: C (blue), Y (green), O (red), H (pink). Each PDOS is plotted for both the spin up (solid lines) and spin down (dashed lines) projection.

### Calculated optical spectra.

The DFT calculated ground state electronic structures provide solutions to solving the one electron Kohn-Sham (KS) equation in the form of Kohn-Sham orbitals (KSOs),  $\varphi_{\sigma,i}^{KS}$ , and their respective energies,  $\varepsilon_{i,\sigma}$ . The use of spin unrestricted DFT provides solutions for both spin up ( $\alpha$ ) and spin down ( $\beta$ ) projections, indicated by  $\sigma$ . From the calculated KSOs the transition dipole moment can be calculated with spin conservation in the independent orbital approximation between two states  $i$  and  $j$ ,  $\vec{D}_{\sigma,ij} = e \int \varphi_{\sigma,i}^{KS*} \vec{r} \varphi_{\sigma,j}^{KS} d\vec{r}$ . The transition dipole moment is then used to calculate the oscillator strength,  $f_{\sigma,ij}$ , for the transition  $ij$ , as  $f_{\sigma,ij} = |\vec{D}_{\sigma,ij}|^2 \frac{24\pi m_e \omega_{ij}}{3\hbar e^2}$ , where  $\omega_{ij}$  is the energy of the transition. The oscillator strength is used to weight the absorption of the transition,  $a_{\sigma,ij}$ , allowing for the calculation of the absorption spectrum as  $a_{\sigma}(\varepsilon) = \sum_{\sigma,ij} f_{\sigma,ij} \delta(\varepsilon - \Delta\varepsilon_{\sigma,ij})$ ;  $a(\varepsilon) = a_{\alpha} + a_{\beta}$ .
